# Supplementary material
Source: PubMed Central journal article supplement (PMC6288282)
Supplement: 41437_2018_84_MOESM2_ESM.pdf [file 41437_2018_84_MOESM2_ESM.pdf]

**Supplementary Table S1:** Details of populations studied in the present study. Subdioecy is prevalent in 12 natural populations present in three geographically isolated valleys.

| S. no. | Population      | Valley | Population Code | Geographical correlates      | Population   | Gender of Collected Genotypes |        |                    | Total |
|--------|-----------------|--------|-----------------|------------------------------|--------------|-------------------------------|--------|--------------------|-------|
|        |                 |        |                 |                              |              | Male                          | Female | Polygamomonoecious |       |
| 1.     | Takmar          | NUBRA  | TK              | 34°22'.542"N<br>77°40'.041"E | Dioecious    | 3                             | 1      | -                  | 4     |
| 2.     | Shyok River Bed |        | SR              | 34°26'.937"N<br>77°43'.886"E | Dioecious    | 2                             | 2      | -                  | 4     |
| 3.     | Khalsar         |        | KH              | 34°27'.642"N<br>77°42'.614"E | Subdioecious | -                             | 4      | 1                  | 5     |
| 4.     | Khalsar         |        | KS              | 34°29'.730"N<br>77°42'.713"E | Dioecious    | 2                             | 2      | -                  | 4     |
| 5.     | Khalsar         |        | KR              | 34°30'.476"N<br>77°42'.414"E | Dioecious    | 3                             | 3      | -                  | 6     |
| 6.     | Sumur           |        | SU1             | 34°36'.573"N<br>77°37'.065"E | Dioecious    | 4                             | 3      | -                  | 7     |
| 7.     | Sumur           |        | SU2             | 34°36'.420"N<br>77°36'.703"E | Dioecious    | 3                             | 3      | -                  | 6     |
| 8.     | Sumur           |        | SU3             | 34°32'.444"N<br>77°39'.408"E | Subdioecious | 3                             | 3      | 1                  | 7     |
| 9.     | Hundar          |        | HS              | 34°34'.357"N<br>77°29'.702"E | Dioecious    | 4                             | 3      | -                  | 7     |
| 10.    | Diskit          |        | DK              | 34°32'.656"N<br>77°34'.256"E | Subdioecious | 3                             | 3      | 1                  | 7     |
| 11.    | Basgo           | SURU   | BA              | 34°13'.113"N<br>77°16'.715"E | Subdioecious | 1                             | 1      | 3                  | 5     |
| 12.    | Saspool         |        | SP              | 34°14'.768"N<br>77°09'.679"E | Subdioecious | 1                             | 3      | 3                  | 7     |
| 13.    | Ultopo          |        | UT              | 34°15'.318"N<br>77°05'.589"E | Subdioecious | 2                             | 3      | 1                  | 6     |
| 14.    | Nimmu           | INDUS  | NI              | 34°11'.199"N<br>77°20'.537"E | Dioecious    | 3                             | 3      | -                  | 6     |
| 15.    | Upashi          |        | UP1             | 33°50'.489"N<br>77°48'.266"E | Subdioecious | -                             | -      | 4                  | 4     |
| 16.    | Upashi          |        | UP2             | 33°45'.914"N<br>77°45'.815"E | Dioecious    | 2                             | -      | -                  | 2     |
| 17.    | Upashi          |        | UP3             | 33°49'.434"N<br>77°49'.125"E | Dioecious    | 1                             | 2      | -                  | 3     |
| 18.    | Gya             |        | GY              | 33°37'.301"N<br>77°45'.241"E | Subdioecious | -                             | -      | 1                  | 1     |
| 19.    | Lato            |        | LT              | 33°41'.777"N<br>77°44'.498"E | Subdioecious | -                             | -      | 3                  | 3     |
| 20.    | Ranbirpura#     |        | RP              | 34°00'.465"N<br>77°41'.514"E | Dioecious    | 9                             | 10     | -                  | 19    |

| S. no. | Population       | Valley | Population Code | Geographical correlates      | Population  | Gender of Collected Genotypes |        |                    | Total |
|--------|------------------|--------|-----------------|------------------------------|-------------|-------------------------------|--------|--------------------|-------|
|        |                  |        |                 |                              |             | Male                          | Female | Polygamomonoecious |       |
| 21.    | Shey#            |        | S               | 34°05'.223"N<br>77°38'.289"E | Dioecious   | 7                             | 7      | -                  | 14    |
| 22.    | Sindhu Darshan # |        | SD              | 34°05'.269"N<br>77°36'.687"E | Dioecious   | 3                             | 3      | -                  | 6     |
| 23.    | Choglamsar*<br># |        | CV              | 34°05'.236"N<br>77°36'.090"E | Subioecious | 7                             | 7      | 4                  | 18    |
| 24.    | FRL#             |        | FRL             | 34°08'.564"N<br>77°30'.450"E | Subioecious | 6                             | 6      | 5                  | 17    |
| 25.    | Water Park*#     |        | WP              | 34°08'.115"N<br>77°30'.098"E | Subioecious | 1                             | 1      | 5                  | 7     |

\* Populations where floral biology studies were conducted to study the gender expression. # Populations sampled for isolation of gender linked SCAR marker. Finally isolated male specific SCAR maker was validated in all populations.

**Supplementary Table S2:** Primer combination used in AFLP. ✓ mark shows the particular combination of EcoRI+selective nucleotides and MseI+ selective nucleotides. ✓ (red) mark and green mark (✓) depicts the primer combination which generated female and male specific fragments across populations respectively. The sequence of primers used for preamplification (EcoRI and MseI specific) was adapted from Vos *et al.*, 1995.

| MseI       | EcoRI |         |           |         |         |       |       |       |
|------------|-------|---------|-----------|---------|---------|-------|-------|-------|
|            | E-ACG | E-ACT   | E-AGC     | E-AGG   | E-AAC   | E-AAG | E-ACA | E-ACC |
| 1. M-CAA   | ✓     | ✓       | ✓         | ✓       |         | ✓     |       |       |
| 2. M-GAC   | ✓     | ✓       | ✓         | ✓       |         | ✓     |       | ✓     |
| 3. M-CAG   | ✓     | ✓       | ✓         | ✓       |         |       |       | ✓     |
| 4. M-CAT   | ✓     | ✓ (red) | ✓ (green) |         | ✓       |       |       |       |
| 5. M-CTA   | ✓     | ✓       | ✓         | ✓       |         | ✓     | ✓     | ✓     |
| 6. M-CTC   | ✓     | ✓       | ✓         | ✓       |         |       | ✓     |       |
| 7. M-CTG   | ✓     | ✓       | ✓         | ✓ (red) | ✓ (red) |       |       | ✓     |
| 8. M-CTT   | ✓     | ✓       | ✓         | ✓       | ✓       |       |       | ✓     |
| 9. M-CAGT  | ✓     | ✓       | ✓         | ✓ (red) |         |       |       |       |
| 10. M-CTAG | ✓     | ✓       | ✓         | ✓       | ✓       |       |       |       |
| 11. M-CTGC | ✓     | ✓       | ✓         | ✓       |         |       |       | ✓     |
| 12. M-CGAT | ✓     | ✓       | ✓         | ✓       |         | ✓     |       | ✓     |
| 13. M-CACG | ✓     | ✓ (red) | ✓         | ✓       |         | ✓     |       |       |

**Supplementary Table S3:** List of primer pairs designed from HRMSSR locus to test its gender specificity across populations. These primer pairs were also used in different combinations to characterize the locus in male and female plants.

| Serial No. | Number indicates the Position/region amplified with the primer pair in HRMSR locus (5'-3') | Primer pair                                            |
|------------|--------------------------------------------------------------------------------------------|--------------------------------------------------------|
| 1.         | 146-607                                                                                    | FP: AGATATAACCATGTGAATCG<br>RP: ACATATAGAAGTTGGAAG     |
| 2.         | 954-1281                                                                                   | FP: CAGAGTCAATTCTAGCTCCT<br>RP:CTCAAGTGCACTAGCCAT      |
| 3.         | 1318-1767                                                                                  | FP:ACGTTGAATTGTTCGCACA<br>RP: AGGTTGGTGAGGAAACATCA     |
| 4.         | 2160-2323                                                                                  | FP:TGGAATTAAGCATCCCT<br>RP:AGGTCCTTGTTTTATTCA          |
| 5.         | 2355-2847                                                                                  | FP:CATGGCTTGGTGCTCAAAGA<br>RP:GAAGTTGCCAACTTGCTACA     |
| 6.         | 2967-3350                                                                                  | FP:TGACAACGAGCCAATTCTT<br>GAATCATTAAATTGGTCGGA         |
| 7.         | 2967-4070 (HRSS1-HRML2)                                                                    | FP:TGACAACGAGCCAATTCTT<br>RP:CACTCGGCGCTCTAGGATAG      |
| 8.         | 3742-4070 (HRML1 and HRML2)                                                                | FP:GGTTCATTTCTGTTACTCTGA<br>RP:CACTCGGCGCTCTAGGATAG    |
| 9.         | 3742-4419 (HRML1 and HRML3)                                                                | FP:GGTTCATTTCTGTTACTCTGA<br>GAGCTTGTAGAATACTGTGG       |
| 10.        | 4518-4998                                                                                  | FP:AATCCCATAAACTGCCTCGA<br>RP:ACATTCGCTTAAGAATTGGCA    |
| 11.        | 4621-5335                                                                                  | FP:GCTCACTAGCAAAGCAACGT<br>RP:ATCTTGTTGGACTTCTTGCTAGAG |
| 12.        | 5452-5995                                                                                  | FP:TAACCTATGAGCTTAGGCCG<br>RP:ATGCCTTTTGTTGAGGTTG      |
| 13.        | 6229-6613                                                                                  | FP:GCTGAGGCATTAATTAGCCC<br>RP:ATGGGTAGCGATATGGTCTCAC   |

**Supplementary Table S4:** Summary of homology search of RDA based sequences at NCBI and Repbase databases

| Sl. No | Primer Name | Homology at NCBI database                                                                                       |                    |                    |              |               | Homology at Repbase database                                                                                  |     |        |           |       |
|--------|-------------|-----------------------------------------------------------------------------------------------------------------|--------------------|--------------------|--------------|---------------|---------------------------------------------------------------------------------------------------------------|-----|--------|-----------|-------|
|        |             | Sequence                                                                                                        | Query coverage (%) | E-Value            | Identity (%) | Accession no. | Sequence                                                                                                      | Dir | Sim    | Pos/Mm:Ts | Score |
| 1.     | RDAP-27     | <i>Hippophae rhamnoides</i> clone pLBSSR2123 microsatellite sequence                                            | 42                 | 3 <sup>e-93</sup>  | 98           | GQ241403.1    | Satellite; Simple Repeat; Sat1_Mad, from <i>Malus domestica</i> (apple),(Rosaceae)                            | c   | 0.9344 | 1.5000    | 966   |
| 2      | RDAP-33     | <i>Vigna angularis</i> var. <i>angularis</i> DNA, scaffold: Scaffold_1655, complete sequence, cultivar: Shumari | 4                  | 4 <sup>e-05</sup>  | 86           | AP016699.1    | Gypsy; LTR Retrotransposon; Transposable Element; Gypsy2_Pru_; from peach ( <i>Prunus persica</i> , Rosaceae) | c   | 0.6667 | 1.8873    | 490   |
| 3      | RDAP-41     | <i>Hippophae rhamnoides</i> clone pLBSSR2123 microsatellite sequence                                            | 96                 | 3 <sup>e-175</sup> | 95           | GQ241403.1    | EnSpm/CACTA; DNA transposon; Transposable Element; CACTA; Caspar; from <i>Triticum monococcum</i> (Poaceae)   | d   | 0.6931 | 1.4211    | 269   |
| 4      | RDAP-47     | <i>Hippophae rhamnoides</i> clone PLBSSR2094 microsatellite sequence                                            | 59                 | 7 <sup>e-51</sup>  | 89           | GQ241412.1    | Internal region of LTR retroposon, SHACOP_MT, from <i>Medicago truncatula</i> (Fabaceae)                      | d   | 0.7692 | 1.2632    | 554   |

# Dir- stands for direction: complementary (c) or direct (d); Pos is roughly the ratio of pairs of bases that produce positive scores in the alignment matrix to the alignment length; Mm:Ts is a ratio of mismatches to transitions in nucleotide alignment

**Supplementary Table S5:** Result of sequencing, BLASTn and Primers sequence (nucleotide sequence in red colour) designed for the conversion of sequences obtained by AFLPs into gender-linked SCAR markers.

| Sequence from Selective Primer combination | Sequence (5'-3')                                                                                                                                                                                                                                                                                                  | Primer (5'-3')                                                         | Blast result                                                                                                                                  | e-Value           | Anealing Temperatur efor SCAR | Specificity0f SCAR primers |
|--------------------------------------------|-------------------------------------------------------------------------------------------------------------------------------------------------------------------------------------------------------------------------------------------------------------------------------------------------------------------|------------------------------------------------------------------------|-----------------------------------------------------------------------------------------------------------------------------------------------|-------------------|-------------------------------|----------------------------|
| E-ACT + M-CAT                              | GACTGCGTACCAATTCACTG <b>ATGCTACTCAACTGG</b><br><b>GATT</b> TGAGCCGATAGACTATGAGGATCTCTCAGAA<br>GCCCTAACTCATCTAAGGCATACCACTAGTGTAGT<br>AGCATACCAGGAAGCGTTTGAAAATTGTCACAG<br>AGTGGACGGTTTACCAAAATAATTCCTAATAGGGT<br>GATTCATAGTT <b>GGACTGAGGGATAAAATATGCC</b> TT<br>GATGTTACTCAGGACTCTC                              | FP:<br>ATGCTACTCAACTGGGATT<br>TG<br>RP:<br>GGCATATTTTTATCCCTCAG<br>TCC | <i>Populus trichocarpa</i> clone POP029-P20, complete sequence and <i>Vitis vinifera</i> contig VV78X033551.38, whole genome shotgun sequence | 2e <sup>-08</sup> | 50°C/52°C                     | None                       |
| E-AGG + M-CAGT                             | GACTGCGTACCAATTCAGGCA <b>CAAGATAATGCACA</b><br><b>TCATATTC</b> CACACAAGTATATATTAGTCAAGTCAG<br>ACCCTACTTGAAAATAGTAAGGCAAGAGACACACA<br>AGCATGTAGCAGAGGCACACATAATGTCATAATGA<br>TACAAGCAGAAGTCAAGCTAGCAAAAAACAGAAT<br>AAAATAGATTGAGTTAG <b>GC</b> <b>AAAG</b> <b>AAGAAGCTCGA</b><br><b>GACT</b> TACTGTTACTCAGGACTCATC | FP:<br>CAAGATAATGCACATCATA<br>TTC<br>RP:<br>GTCTCGAGCTTCTTCTTTGC<br>C  | No significant match                                                                                                                          |                   | 50°C/52°C                     | None                       |
|                                            | GATGAGTCCTGAGTAACAGTAAGTCTCGAGCTTCT<br>TCTT <b>TGCCTAACTCAATCTATTTTG</b> TTCTGTTTTTTG<br>CTAGCTTGACTTCTGCTTGTATCATTATGACATTAT<br>GTGTGCCTCTGCTACATGCTTGTGTGTCTCTTGCC<br>TACTATTTTCAAGTAGGGTTTGACTTGACTAATATA<br>TACTTGT <b>GTGGAATATGATGTGCATTATC</b> TTGTGCC<br>TGAATTGGTACGCAGTC                                | FP:<br>TGCCTAACTCAATCTATTTT<br>GT<br>RP:<br>GATAATGCACATCATATTC<br>CAC | No significant match                                                                                                                          |                   | 50°C/52°C                     | None                       |
|                                            | GATGAGTCCTGAGTAACAGTGCTAGCTGTTTATAA<br>TCATGATATAATA <b>ATAACGTTGTTATGCTTGCGAA</b><br>ATATTAAGTTACCGCTCGGAATTATCTATTTTTCG<br>GCAAATTCGAACGGCCGCGATCCCTCTCCTTGATC<br><b>CATTCCACCGTAGCTATG</b> CGTTTTCTATTTTTTTAT<br>TTCTTTTCTACTTCCCCCTGATTGGTACGCAGTC                                                            | FP:<br>ATAACGTTGTTATGCTTGC<br>GAA<br>RP:<br>CATAGCTACGGTGGAAATGG       | <i>Hippophae rhamnoides</i> clone pLBSSR2123 microsatellite sequence                                                                          | 1e <sup>-35</sup> | 50°C/52°C                     | None                       |

|                         |                                                                                                                                                                                                                                                                                                                                                                                                                                                                                                                                        |                                                                                 |                                                                                                                                                 |                   |           |      |
|-------------------------|----------------------------------------------------------------------------------------------------------------------------------------------------------------------------------------------------------------------------------------------------------------------------------------------------------------------------------------------------------------------------------------------------------------------------------------------------------------------------------------------------------------------------------------|---------------------------------------------------------------------------------|-------------------------------------------------------------------------------------------------------------------------------------------------|-------------------|-----------|------|
| E-ACC + M-CTG           | GACTGCGTACCAATTCACCCAGAGACGAGGGCGAA<br>GATATTGAGAAAATGCGCGAACGCGCCAGTAAGA<br>ATCACACCTTTGTGTATGTCAAAATTCAGGCATAC<br>CAGTGAAAAGTTAGTTACAAGGGCAAAAAGCAGAA<br>GACTGTGACAGACTTGAAGAACATGAGCTTGACAT<br>TGCCCACTTACGAGTATCCCAATTCCTACTCGACTT<br>GGTTGGATCTATTGATGGCAGTTACTCAGGACTCA<br>TC                                                                                                                                                                                                                                                    | FP:<br>AGACGAGGCGAAGATATTG<br>AGA<br><br>RP:<br>ATCAATAGATCCAACCAAG<br>TCG      | No significant match                                                                                                                            | 5e <sup>-04</sup> | 50°C/52°C | None |
|                         | GATGAGTCCTGAGTAACTGATTC AAGTGCTTCACA<br>TCACATGACATCAAATCCTTCAAATCTTGTAATCAA<br>AACTAAATATGAAGGCTTTTATTAATATTTTGATT<br>TTCAAGATCTTGAAAAGATTCTTCTTGTTCTTTA<br>GAGTCCTTTTTGGATTAGGTTTTCAAATCTGATT<br>TTTTTAGATTGTCACTAACAAACCGGTTACTTCTTG<br>AGATTAGGTGAATTGGTACGCAGTC                                                                                                                                                                                                                                                                   | FP:<br>TCAAGTGCTTCACATCACA<br>T<br><br>RP:<br>AGAAGTAACCGGTTTGTTA<br>G          | No significant match                                                                                                                            | -                 | 50°C/52°C | None |
|                         | GATGAGTCCTGAGTAACTGATGGAAGTTTTATGGA<br>TCAAATTTAGGCTGAGGAGAAGCTAAGGGTGATGG<br>TAAAGACTAATTCAAATGTGGAACAAAACCTTTGC<br>CAAAATGATACCAGCAAGCAGAGACAATATGCCCT<br>AACTTTCTACATAACTGGCACTATGGACGATTGTGT<br>CTTCTTCTACCACGACCTCTTCCAAAGTTATTATAA<br>GGATCAAACGGTGAATTGGTACGCAGT                                                                                                                                                                                                                                                                | FP:<br>GAAGTTTTATGGATCAAAT<br>TTAGG<br><br>RP:<br>TGATCCTTATAATAACTTTG<br>GAAGG | No significant match                                                                                                                            | -                 | 50°C/52°C | None |
| E-AGC + M-CAT<br>(HRML) | AGAATAGAATTGAGAGAGAAAAGAGAAAAGAGAGT<br>TAGGGAGGCAGAGGGATAATTGGTTTCATTTCTGT<br>TACTCTGATGCCTAACTATTTGCTCAATGGTCCCC<br>TCCTACGCCGTTCTGTGTTATCATGTGCTCAGTTG<br>CACCCACTGCGTGCCGCATGTGTGTTGGTCTGTTGCG<br>TGCGCGGTTGTGCGAGTAGAATCTTCATGTAACAT<br>TTCTCCCCCTCTTTCAAATCCTTGCCACAAGGAT<br>GAAGTCAGGATAGGACTTGGAGAAGCGCCATTCAT<br>TCTCCAACTAGCTGCCTCGGTTGGAGCCCCCTACCC<br>ATTTGACCAGAGTTTCAAATTTGGTTGATATCTAT<br>CCTTCTGAATCACTCGGCGCTTAGGATAGCTTCAG<br>GCTGTTTATGATCGTTGAGTGTCTGAGATTGAAGT<br>TAGTTGGGAGATGGTAGGGTAATGGTCTTATGT<br>GCTTCTTCAAC | FP:GGTTCATTTCTGTTACTC<br>TGA<br><br>RP:<br>CTATCCTAGAGCGCCGAGT<br>G             | <i>Populus trichocarpa</i><br>clone POP029-P20, complete sequence<br><br>Or<br><i>Vitis vinifera</i><br>contigs..genome<br>shotgun<br>sequenece | 1e <sup>-28</sup> | 50°C/52°C | Male |

|                                           |                                                                                                                                                                                                                                                                                                                                                                                                                                                                                                                                                                                                                                                     |                                                                              |                                                                             |                   |      |                                                                                                                                                                 |
|-------------------------------------------|-----------------------------------------------------------------------------------------------------------------------------------------------------------------------------------------------------------------------------------------------------------------------------------------------------------------------------------------------------------------------------------------------------------------------------------------------------------------------------------------------------------------------------------------------------------------------------------------------------------------------------------------------------|------------------------------------------------------------------------------|-----------------------------------------------------------------------------|-------------------|------|-----------------------------------------------------------------------------------------------------------------------------------------------------------------|
| <b>E-ACT + M-CACG</b><br><b>(AFLP-32)</b> | AGCAATTTAGGGAGCGACACATGATAGGGGAGAC<br>CGATTAGAGGCAATGCTCGCTGAGTTAGTGACATG<br>TGGCATGTTGACCAATTTTTGCACTTGGATTGAACG<br>TTATGCTAATACGTGACACACGTTTCATCCTCCTCA<br>CACGCGGGGTGATATGATTCTCTCTTTGTGCTTGTG<br>TGGTTTGACTAGTCAACTCATTTGATTGTGTGACAT<br>GACA                                                                                                                                                                                                                                                                                                                                                                                                   | FP:AATTTAGGGAGCGACAC<br>ATGATAG<br><br>RP:<br>GTCATGTCACACAATCAAA<br>TGAGTTG | No Match                                                                    | -                 | 64°C | size variation in some populations while for some populations it gave two bands in male for others in female                                                    |
| <b>E-AGG + M-CTG</b><br><b>(AFLP-15)</b>  | CGACGGCCCGGGCTGGTAAATTTAATTTAATTATAT<br>AATATGTGCATATTTTTAAGCTTCAAGCTTAATTA<br>CTTATTAGAATGTGGTTGGGAATAAAGTTATGATT<br>TTTGAAGTAAATAGTTGCACTTAGTATT <b>CACCTAAG</b><br><b>GGTTGAAGTATCCAA</b> TTTTAAAAGGAGTACTACAT<br>AAACAATAGAATAATATTGTTTGAATATGGTTTTG<br>AATAAAATTATACTTTTTGAAGTAAATTTTGTATT<br>AATATGCACCGAAGAGTATCTTATGAATAATATTG<br>AGGGTCAATAATAGTAGTGAAAGATTTAGCATCTG<br>AATTCAGGTGGGACTAGAGTTGTCAATGAGGCCAA<br>GTCGGCT <b>CAATACGGTATGGTCTAGT</b> CAGTTAATT<br>AGTATGTCATGTCTATATTTTTAGCCTGTGGCTTTT<br>ATCGTATCATGCTTGGTTCGTTAAGTTGTGCTTAAT<br>AGGACTGTATAACTTGTGGCCCATTTAGTCCATTAT<br>TTGAAAAAATACCAGCCCCGGCCGTCGACCACGCG<br>TGCCCTATAGTA | FP:<br>CACCTAAGGGTTGAAGTAT<br>CCAA<br><br>RP:<br>CAATACGGTATGGTCTAGT         | <i>Vicia faba</i><br>var. <i>minor</i><br>aap1 gene,<br>promoter<br>region. | 1e <sup>-09</sup> | 66°C | AFLP based primers amplified female specific amplicon. However, when converted into SCAR marker, primer turned out as male specific marker for some populations |
